# Supplementary material
Source: MDPI journal article supplement (https://www.mdpi.com/2304-6740/11/7/288)
Supplement: s1 [file s1]

# Phase Formation of Co and Cr Co-Doped Bismuth Niobate with Pyrochlore Structure

Nadezhda A. Zhuk <sup>1,\*</sup>, Ksenia A. Badanina <sup>1</sup>, Roman I. Korolev <sup>1</sup>, Boris A. Makeev <sup>2</sup>, Maria G. Krzhizhanovskaya <sup>3</sup> and Vladislav V. Kharton <sup>4</sup>

<sup>1</sup> Institute of Natural Sciences, Syktyvkar State University, Oktyabrsky Prospect, 55, 167001 Syktyvkar, Russia;

badanina-ksenia@mail.ru (K.A.B.); korolev36a@gmail.com (R.I.K.)

<sup>2</sup> Institute of Geology of the Komi Science Center UB RAS, Pervomaiskaya st. 48, 167982 Syktyvkar, Russia;

makboris@mail.ru

<sup>3</sup> Institute of Earth Sciences, Saint Petersburg State University, University Emb. 7/9, 199034 St. Petersburg, Russia; krzhizhanovskaya@mail.ru

<sup>4</sup> Osipyan Institute of Solid State Physics RAS, 142432 Chernogolovka, Russia; kharton@issp.ac.ru

\* Correspondence: nzhuck@mail.ru

650 °C

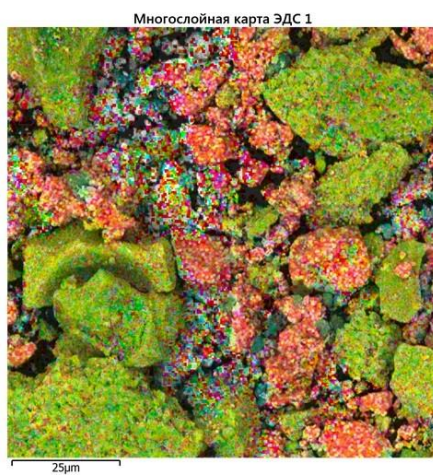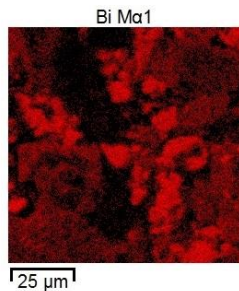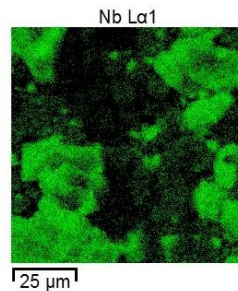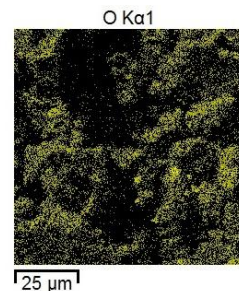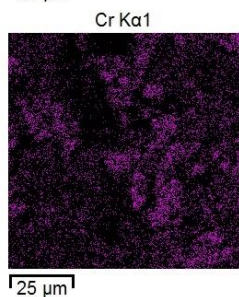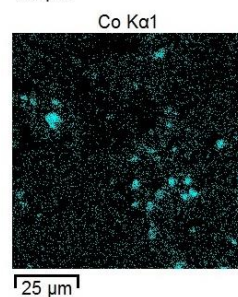

700 °C

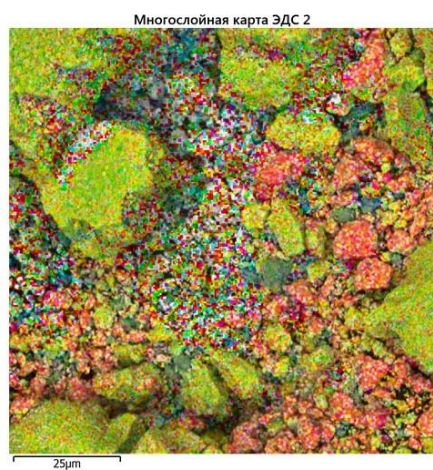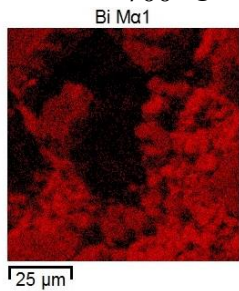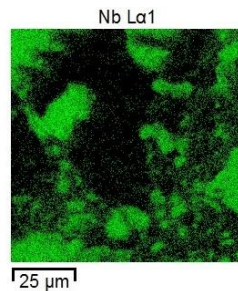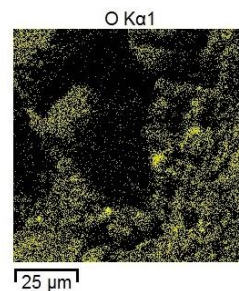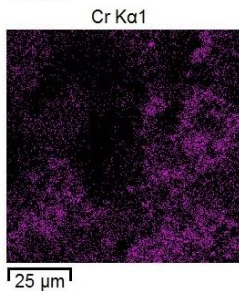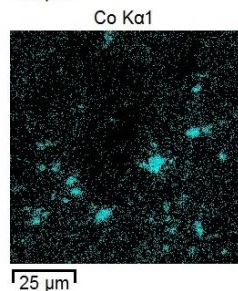

750 °C



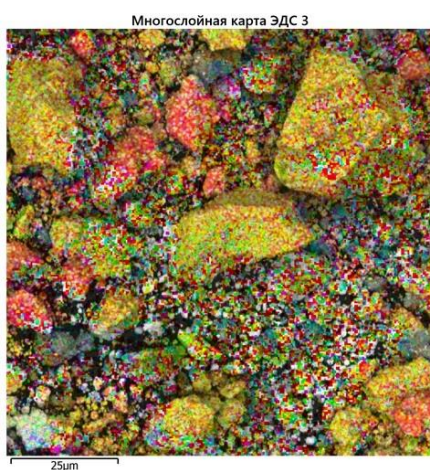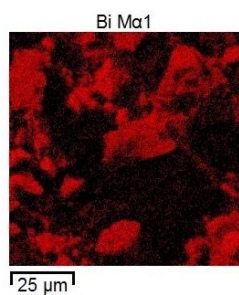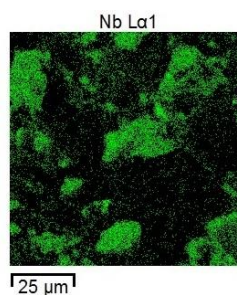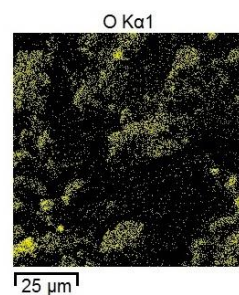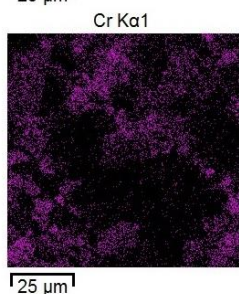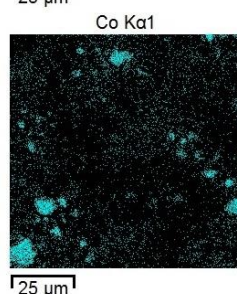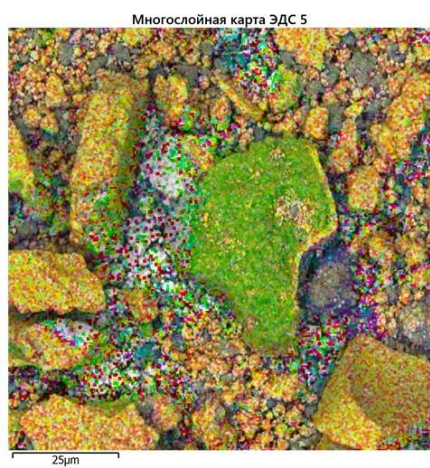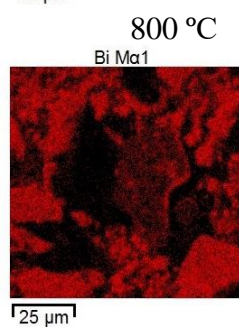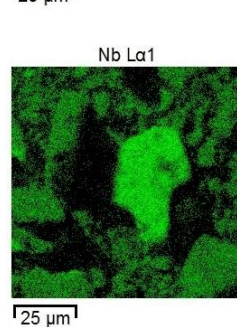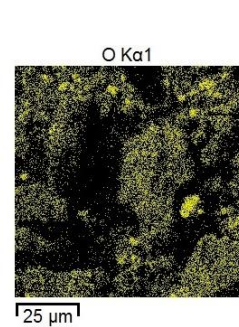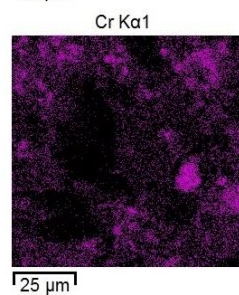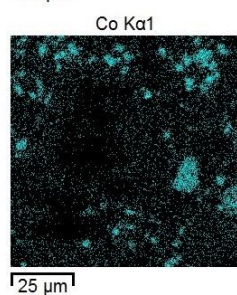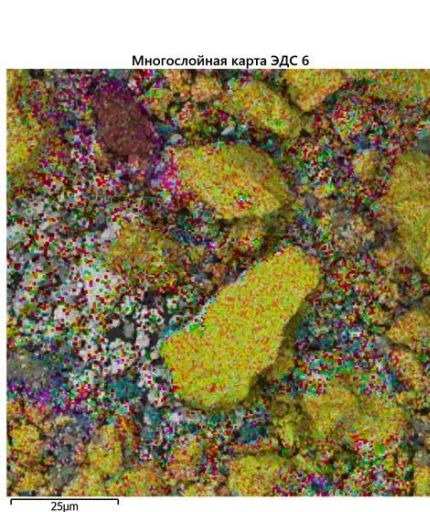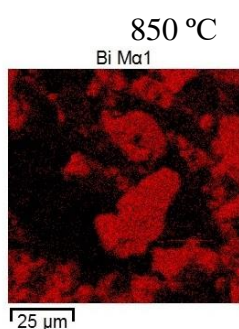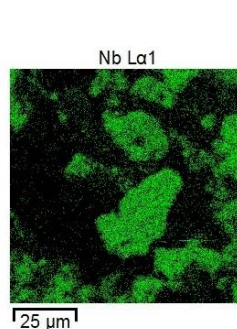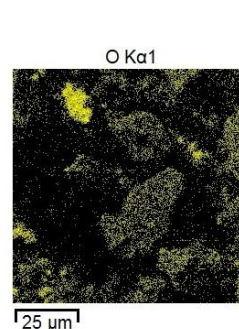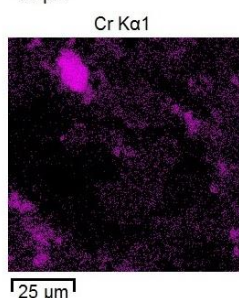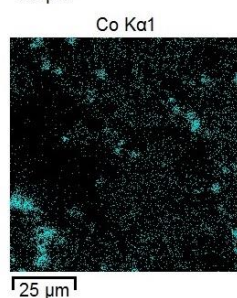

900 °C



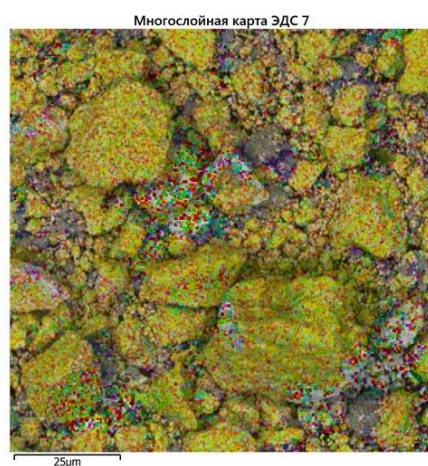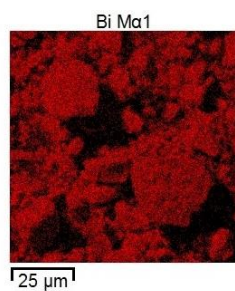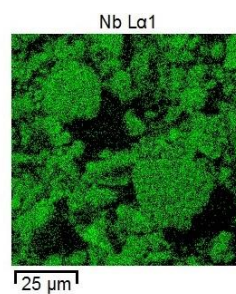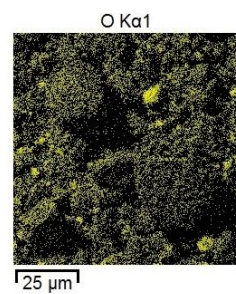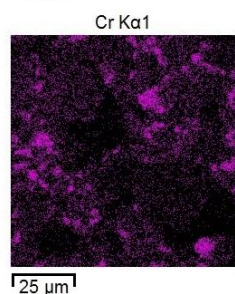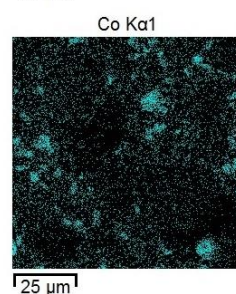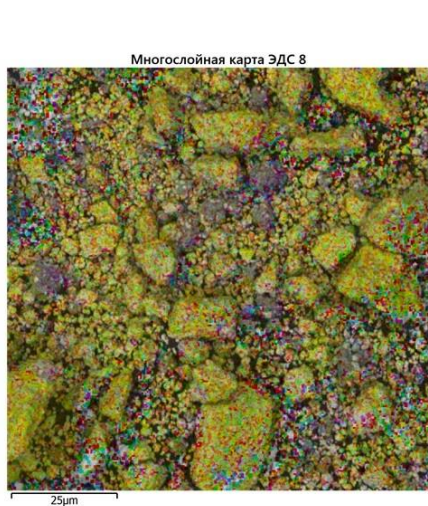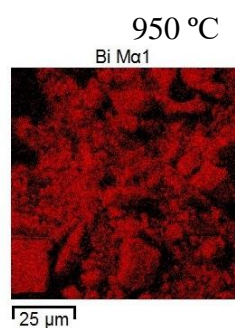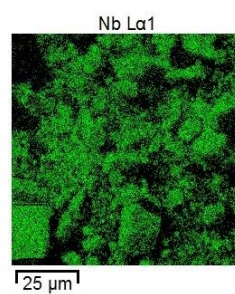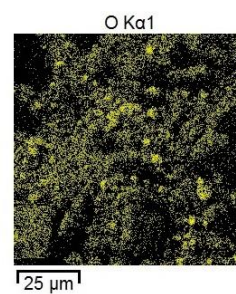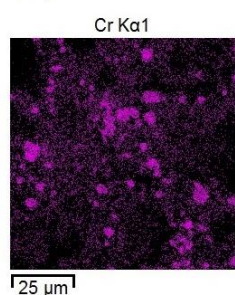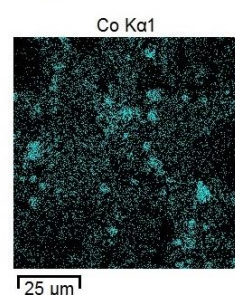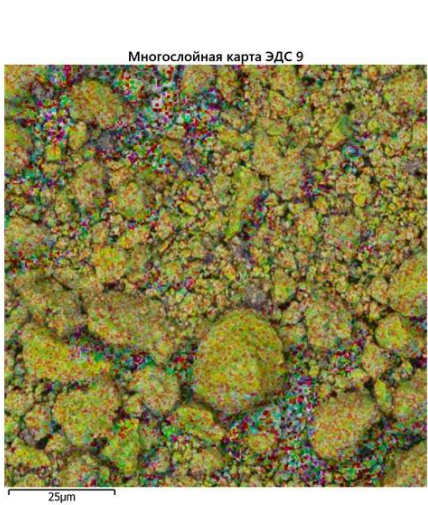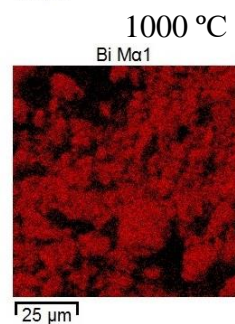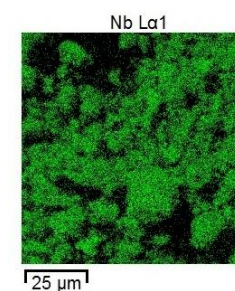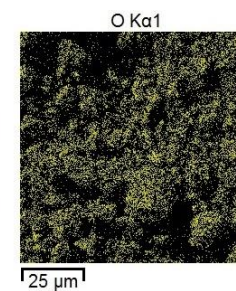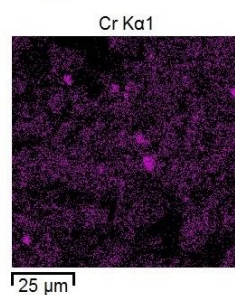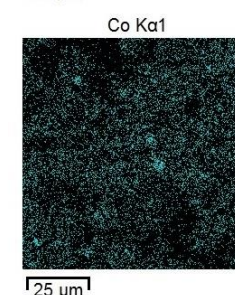

1050 °C



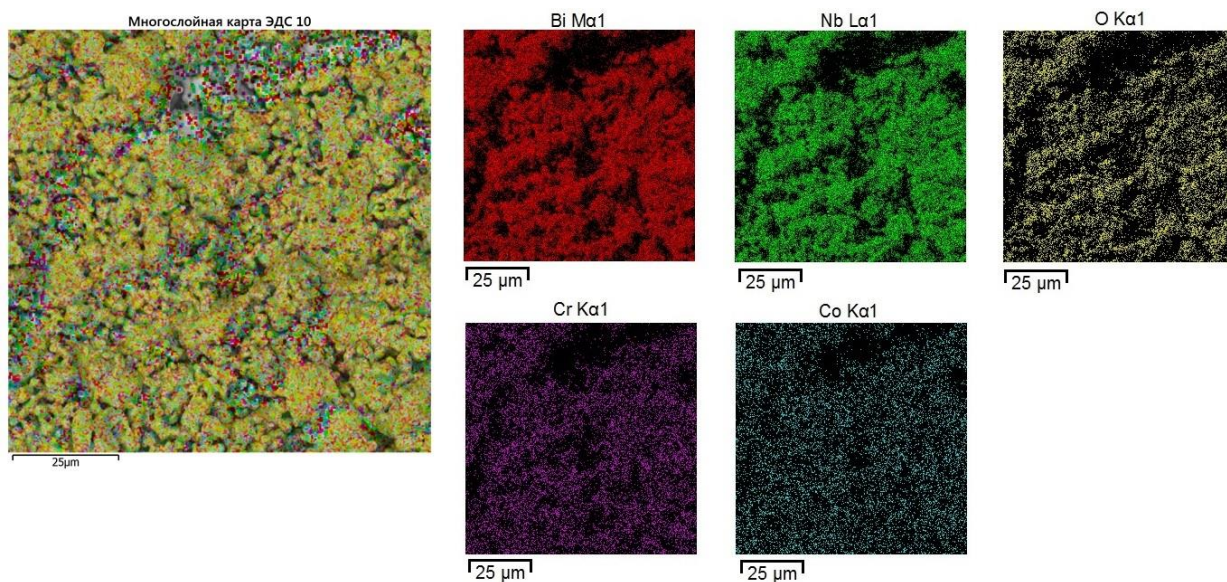

**Figure S1** EDS elemental mapping of the  $\text{Bi}_2\text{Cr}_{0.5}\text{Co}_{0.5}\text{Ta}_2\text{O}_{9+\Delta}$  samples, synthesized at temperatures from 650 to 1050 °C

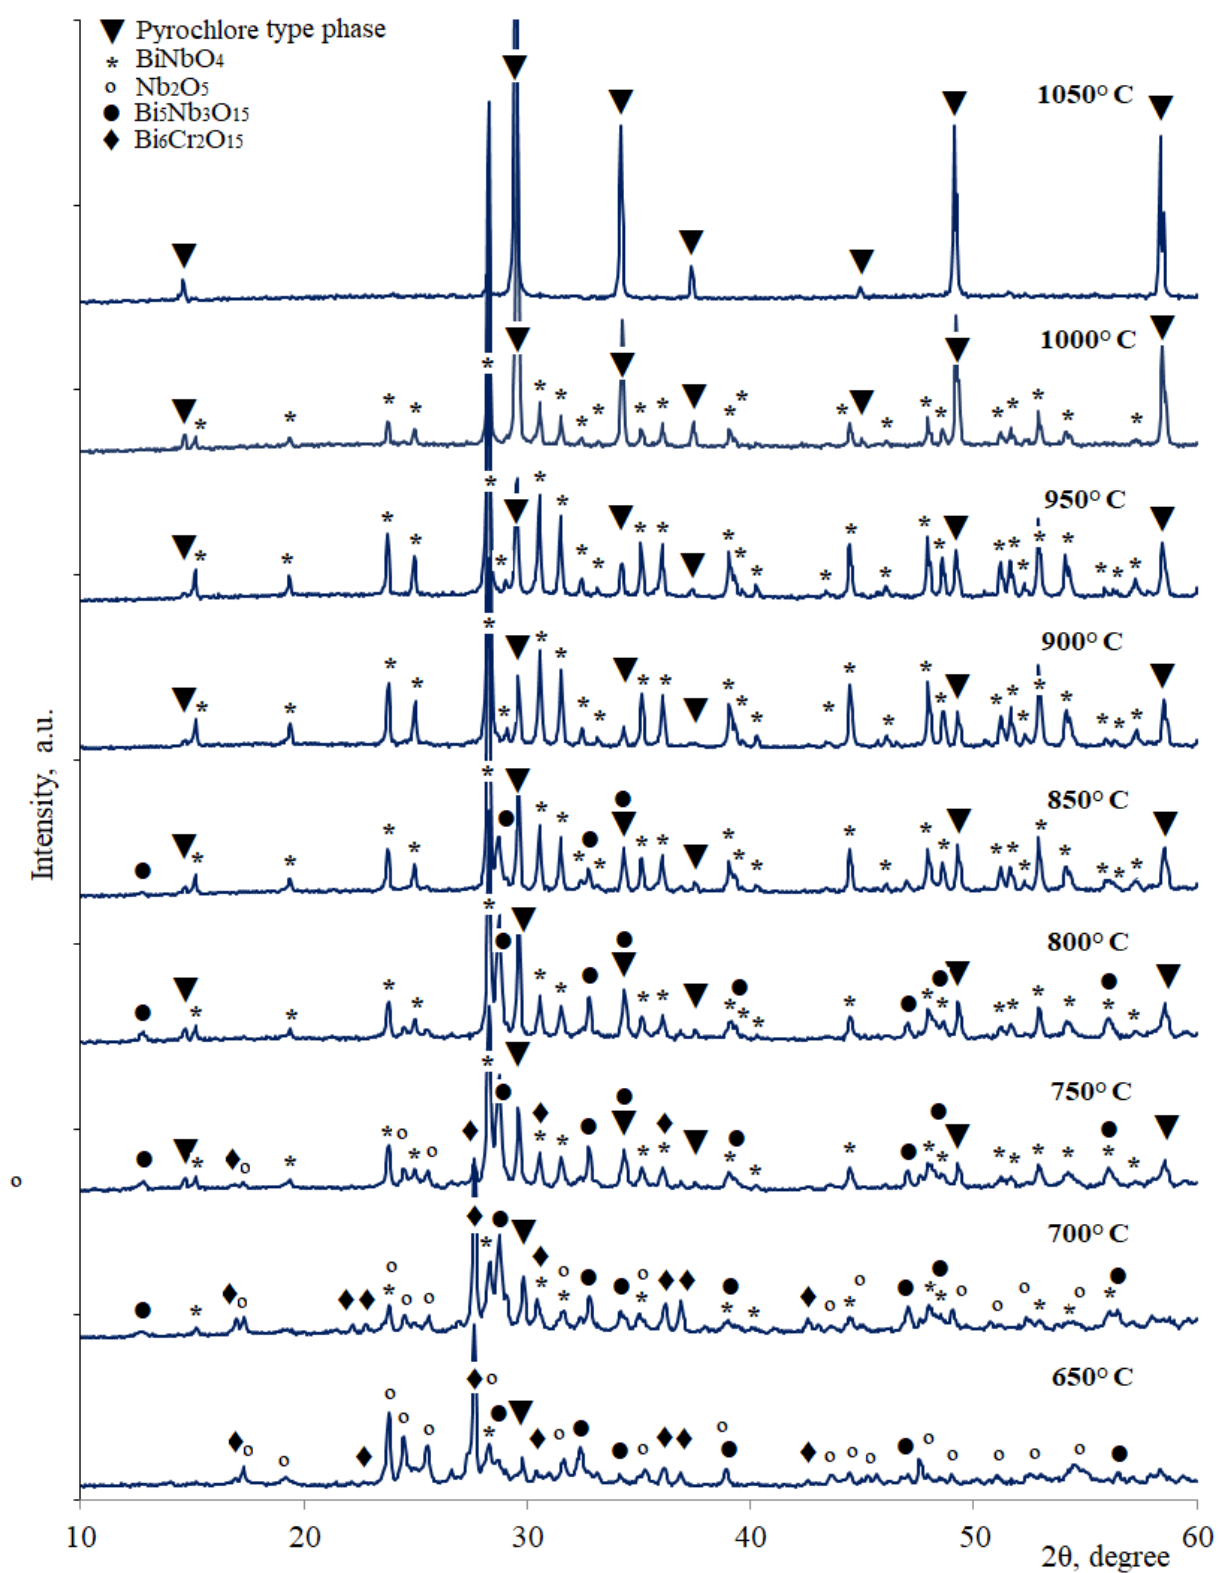

**Figure S2** X-ray diffraction patterns of  $\text{Bi}_2\text{Co}_{1/2}\text{Cr}_{1/2}\text{Nb}_2\text{O}_{9+\Delta}$  sample, synthesized at temperatures from 650 to 1050 °C (15 h).

**Table S1.**

Ratio between pyrochlore and BiNbO<sub>4</sub> phases in Bi<sub>2</sub>Co<sub>1/2</sub>Cr<sub>1/2</sub>Nb<sub>2</sub>O<sub>9+Δ</sub> samples, sequently calcined during 10 and 15 h at each temperature step

| Final calcination temperature, °C | Phase composition, wt. % |            |                      |            |
|-----------------------------------|--------------------------|------------|----------------------|------------|
|                                   | Calcination for 10 h     |            | Calcination for 15 h |            |
|                                   | BiNbO <sub>4</sub>       | pyrochlore | BiNbO <sub>4</sub>   | pyrochlore |
|                                   |                          |            |                      |            |
| 900                               | 66                       | 34         | 85                   | 15         |
| 950                               | 39                       | 61         | 70                   | 30         |
| 1000                              | 10                       | 90         | 24                   | 76         |

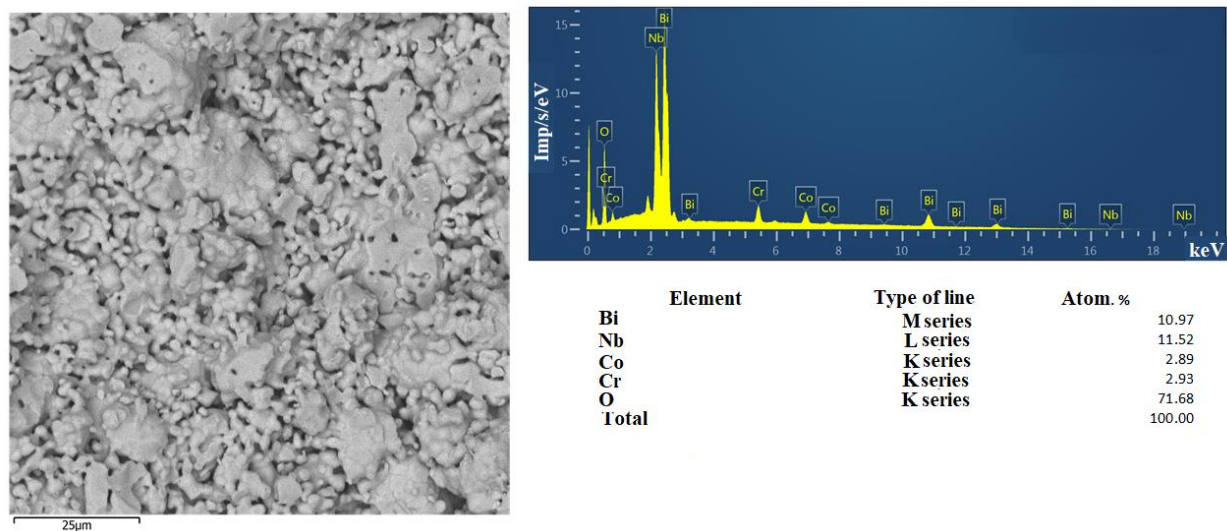

**Figure S3** Microphotograph and EDS analysis of the  $\text{Bi}_2\text{Co}_{1/2}\text{Cr}_{1/2}\text{Nb}_2\text{O}_{9+\Delta}$  sample, calcined at 1050 °C.
